# Supplementary material for: Synthesis of Hexagonal Structured GaS Nanosheets for Robust Femtosecond Pulse Generation
Source: MDPI journal article supplement (doi:10.3390/nano12030378), 2022-01-24
Supplement: s1 [file s1]

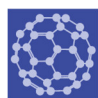

# Synthesis of Hexagonal Structured GaS Nanosheets for Robust Femtosecond Pulse Generation

Kun Guo <sup>1</sup>, Qiang Yu <sup>1</sup>, Fangqi Liu <sup>2</sup>, Haiqin Deng <sup>1</sup>, Tianan Yi <sup>3</sup>, Bo Ren <sup>1</sup>, Wei Su <sup>3</sup>, Sicong Zhu <sup>2</sup>, Zhiqiang Wang <sup>4,5,\*</sup>, Jian Wu <sup>1,\*</sup> and Pu Zhou <sup>1</sup>

<sup>1</sup> College of Advanced Interdisciplinary Studies, National University of Defense Technology, Changsha 410073, China; guokun16@163.com (K.G.); qyu2015@sinano.ac.cn (Q.Y.); ddhq9859@163.com (H.D.); rbone725@163.com (B.R.); zhoup203@163.com (P.Z.)

<sup>2</sup> Hubei Province Key Laboratory of Systems Science in Metallurgical Process, College of Science, The State Key Laboratory for Refractories and Metallurgy, Wuhan University of Science and Technology, Wuhan 430081, China; lfq7@wust.edu.cn (F.L.); sczhu@wust.edu.cn (S.Z.)

<sup>3</sup> College of Mechanical and Electrical Engineering, Hohai University, Changzhou 213022, China;

<sup>4</sup> Aston Institute of Photonic Technologies, Aston University, Birmingham B4 7ET, UK

<sup>5</sup> Advanced Photonic Technology Lab, College of Electronic and Optical Engineering, Nanjing University of Posts and Telecommunications, Nanjing 210023, China

\* Correspondence: z.wang35@aston.ac.uk (Z.W.); wujian15203@163.com, wujian15@nudt.edu.cn (J.W.)

**Citation:** Guo, K.; Yu, Q.; Liu, F.; Deng, H.; Yi, T.; Ren, B.; Su, W.; Zhu, S.; Wang, Z.; Wu, J.; et al. Synthesis of Hexagonal Structured GaS Nanosheets for Robust Femtosecond Pulse Generation. *Nanomaterials* **2022**, *12*, 378. <https://doi.org/10.3390/nano12030378>

Academic Editors: Werner Blau and Bouchta Sahraoui

Received: 22 November 2021

Accepted: 21 January 2022

Published: 24 January 2022

**Publisher's Note:** MDPI stays neutral with regard to jurisdictional claims in published maps and institutional affiliations.

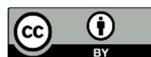

**Copyright:** © 2022 by the authors. Licensee MDPI, Basel, Switzerland. This article is an open access article distributed under the terms and conditions of the Creative Commons Attribution (CC BY) license (<https://creativecommons.org/licenses/by/4.0/>).

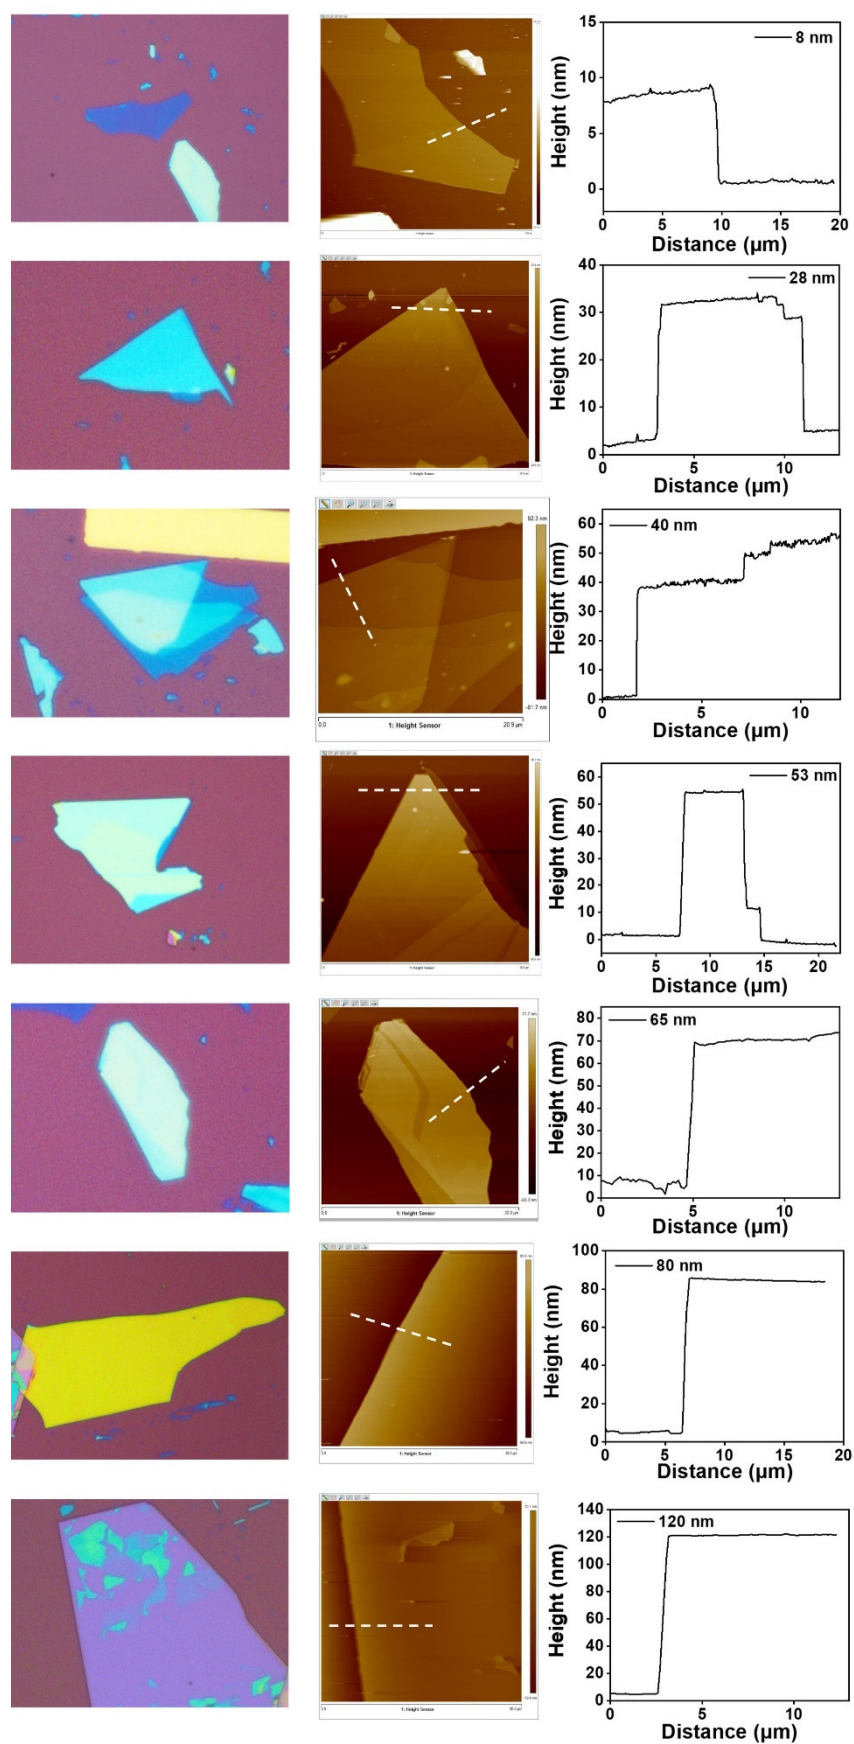

**Figure S1.** Thickness comparison color card of GaS nanosheets.

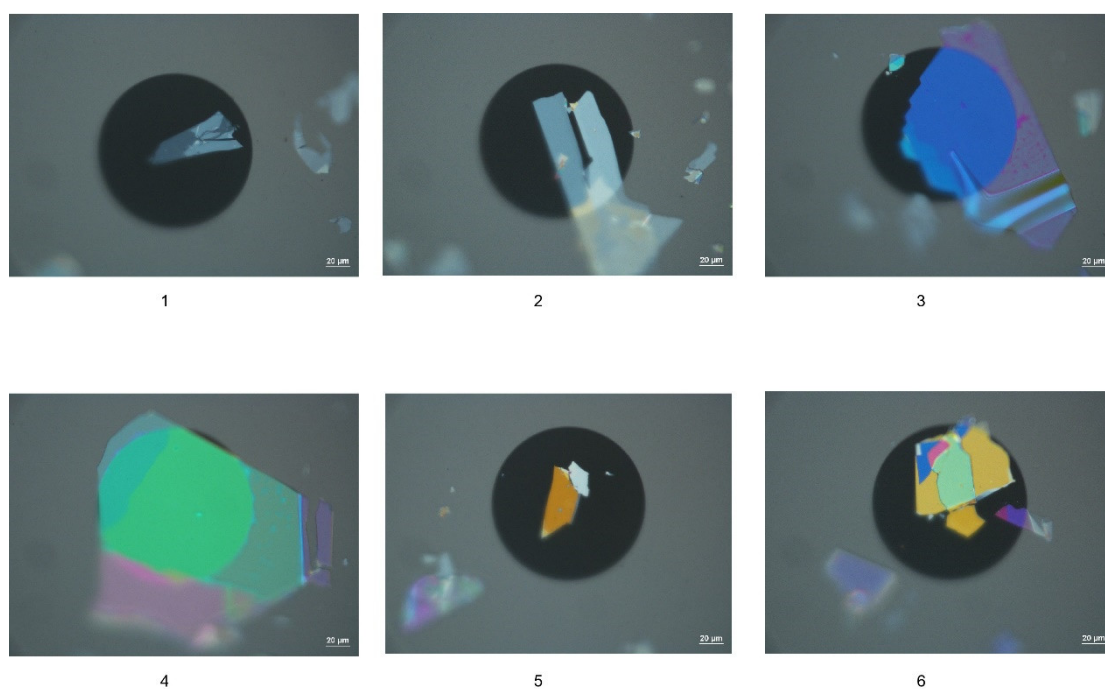

**Figure S2.** Optical images transferred from GaS with different thickness to the end face of fiber.

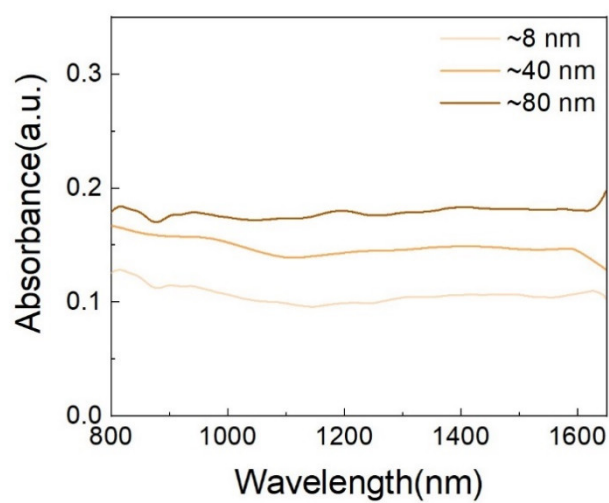

**Figure S3.** Linear optical absorption spectrum of the GaS nanosheets with different thickness.

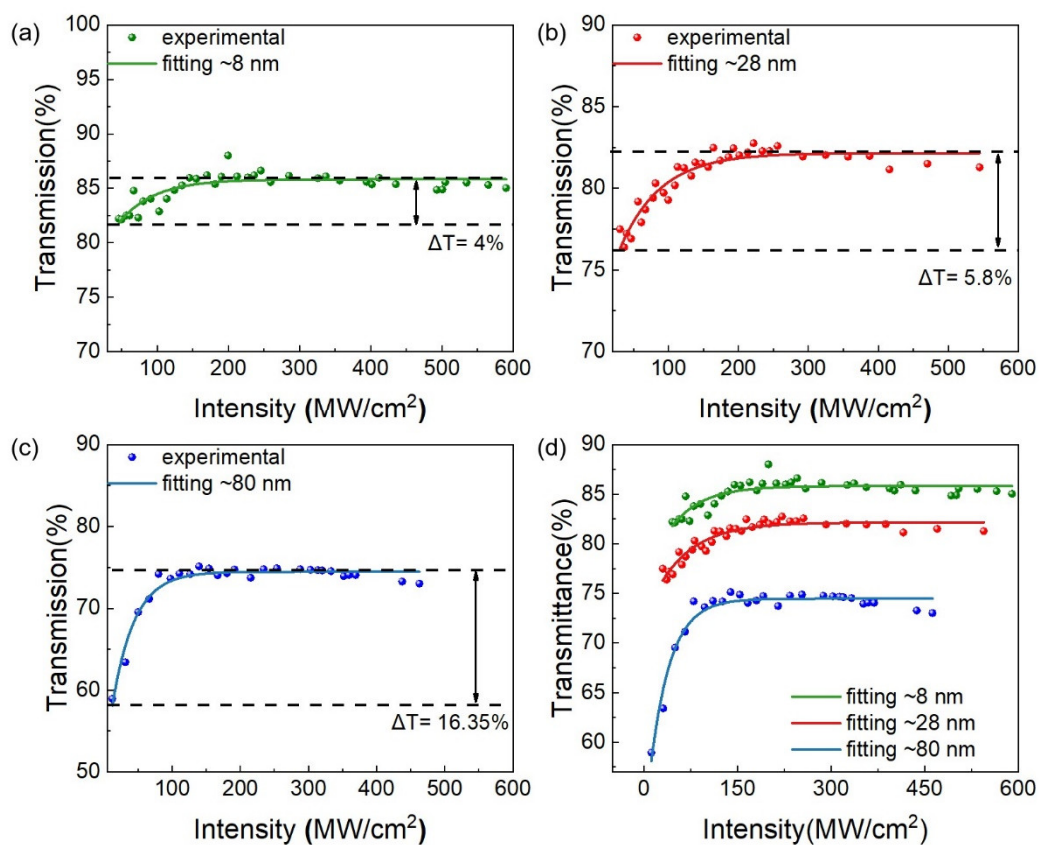

**Figure S4.** Nonlinear absorption properties of the fiber integrated GaS nanosheets. (a–c) Transmission as a function of the incident intensity for different thicknesses under 1560 nm laser excitation. (d) Contrast curve.
